# Supplementary material for: Gene-expression reversal of lncRNAs and associated mRNAs expression in active vs latent HIV infection
Source: PubMed Central journal article supplement (PMC5069461; doi:10.1038/srep34862), 2016-10-19

# Gene-expression reversal of lncRNAs and associated mRNAs expression in active vs latent HIV infection

Madhavan Nair, Vidya Sagar and Sudheesh Pilakka-Kanthikeel

## Supplementary Figure 1:

A) Most highly enriched GO terms for the up-regulated mRNAs: Uninfected control vs Active Infection

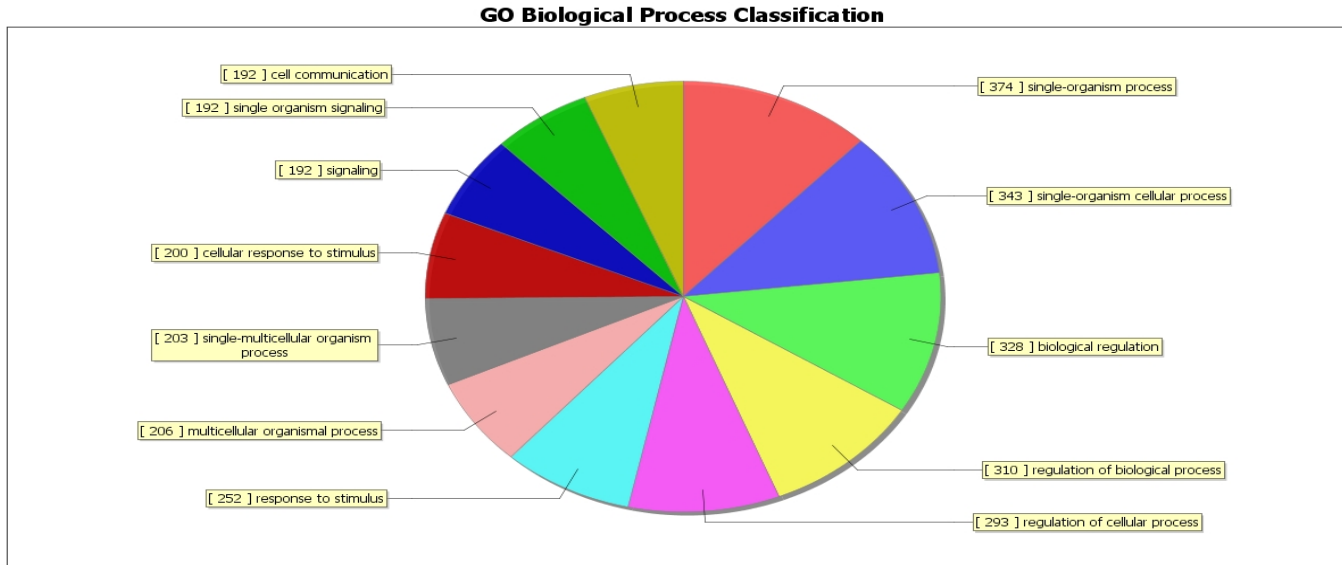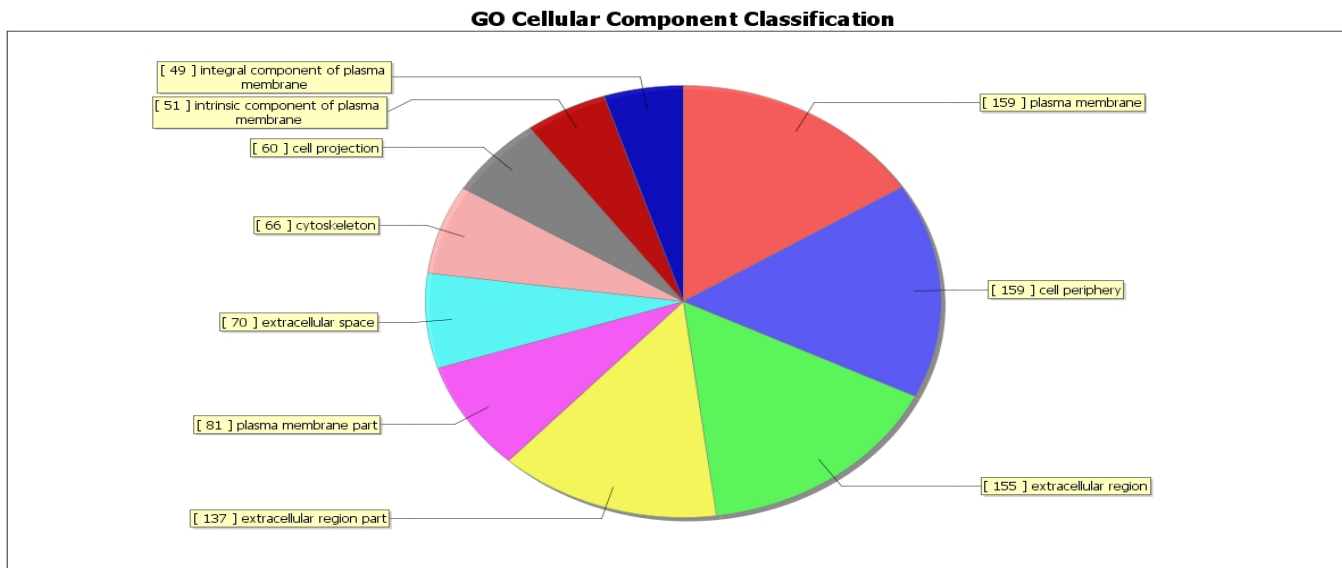

### GO Molecular Function Classification

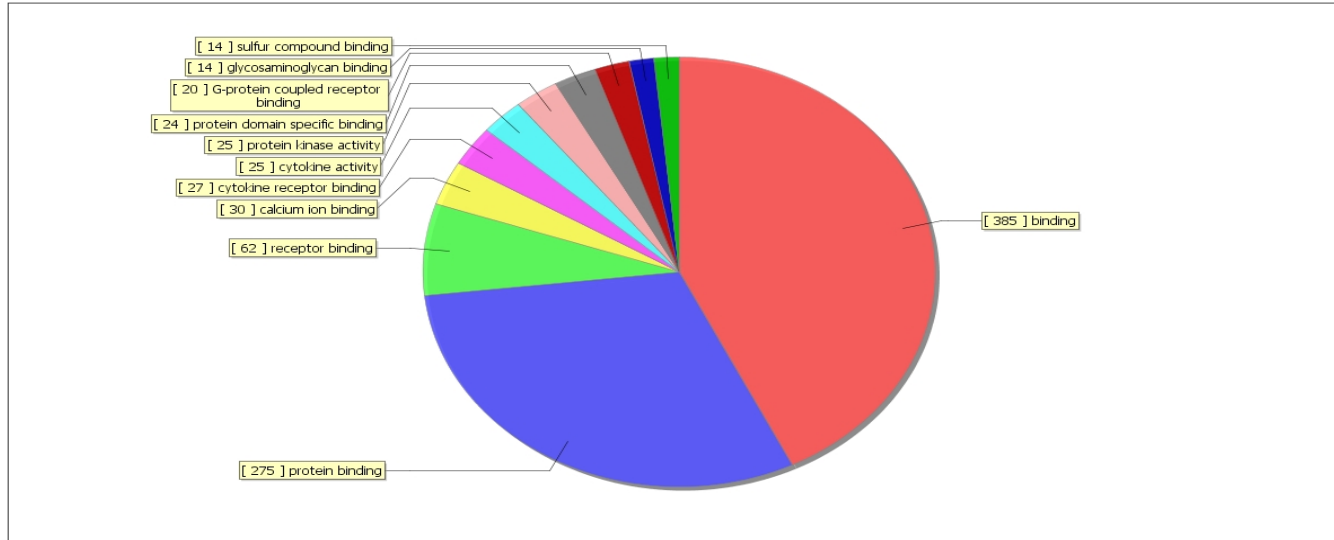

B) Most highly enriched GO terms for the down-regulated mRNAs: Uninfected control vs Active Infection

### GO Biological Process Classification

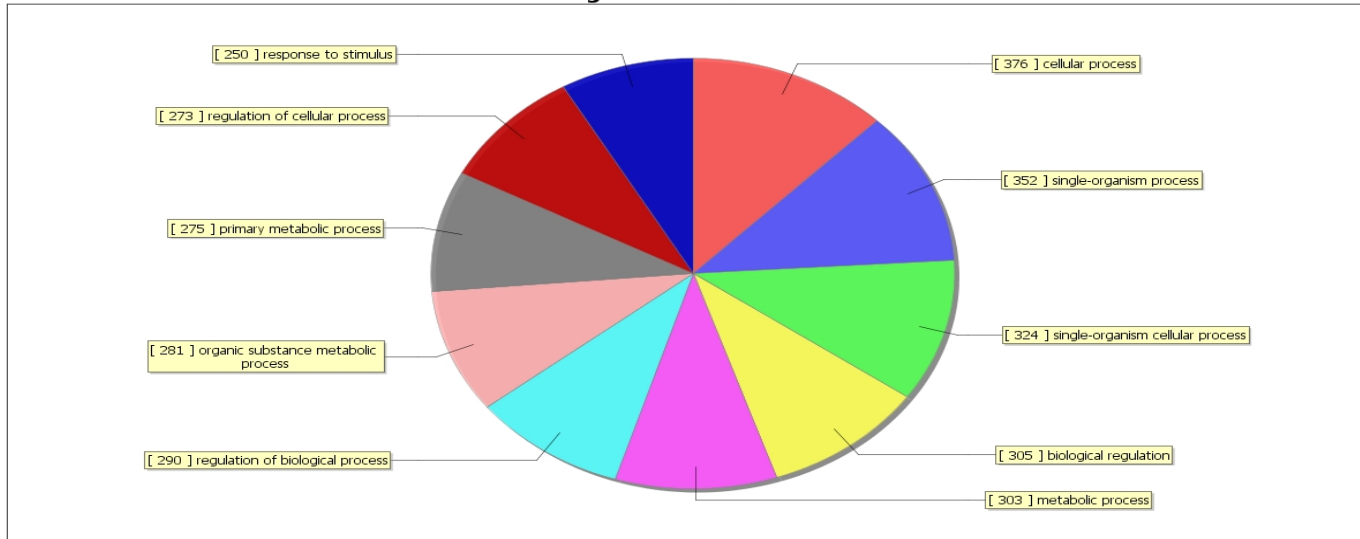

### GO Cellular Component Classification

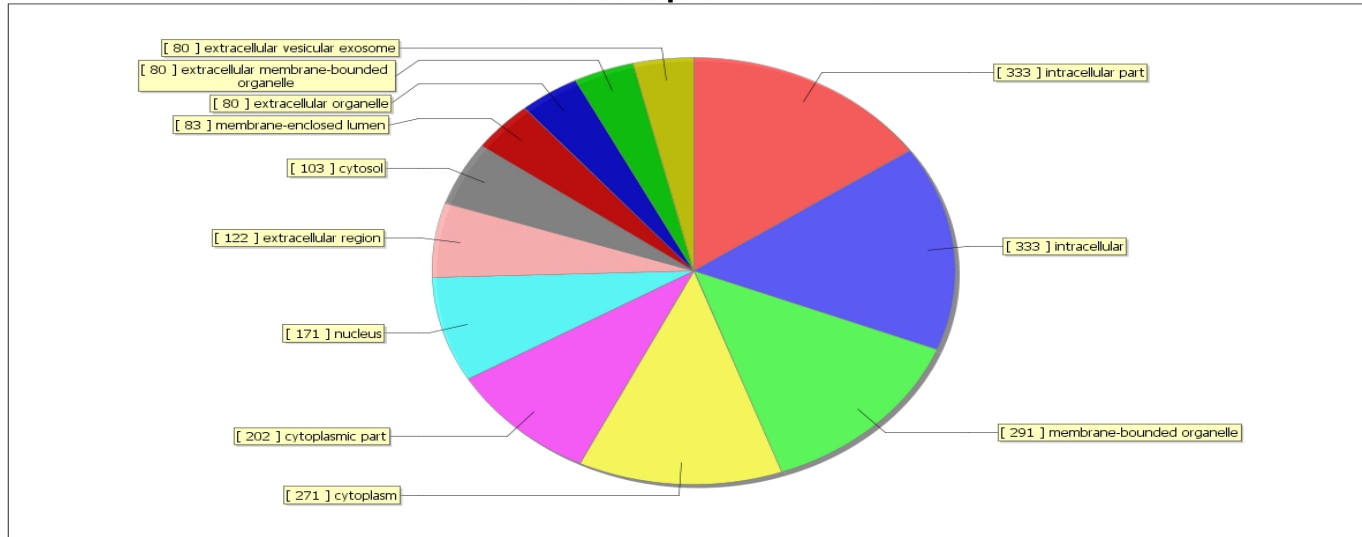

### GO Molecular Function Classification

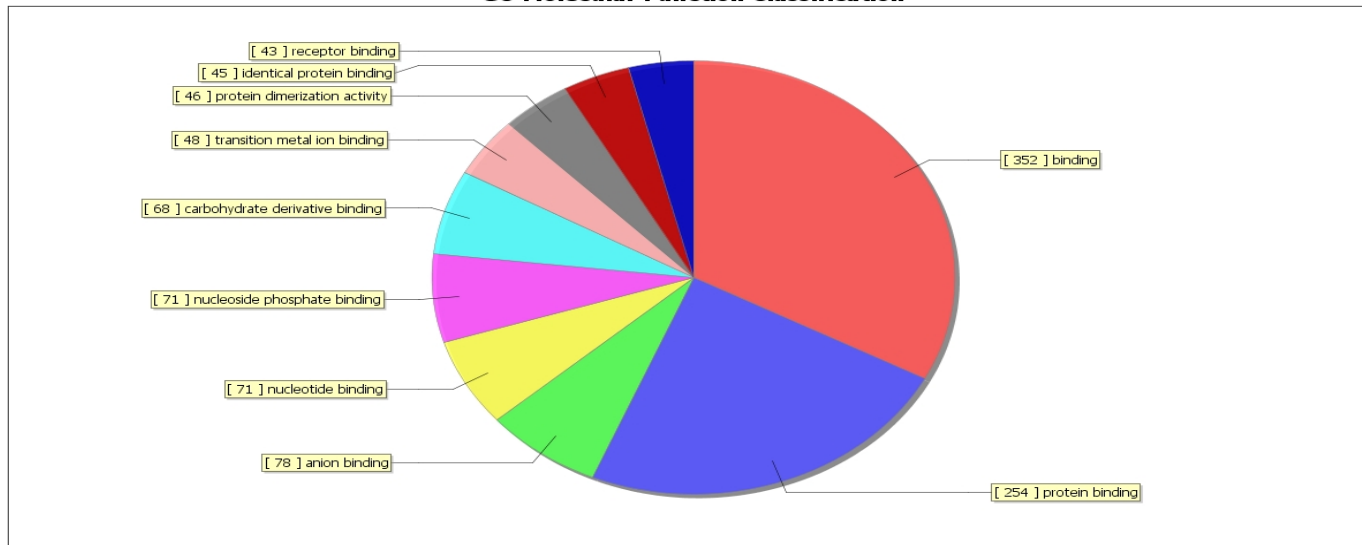

### C) Most highly enriched GO terms for the up-regulated mRNAs: Uninfected control vs Latent Infection

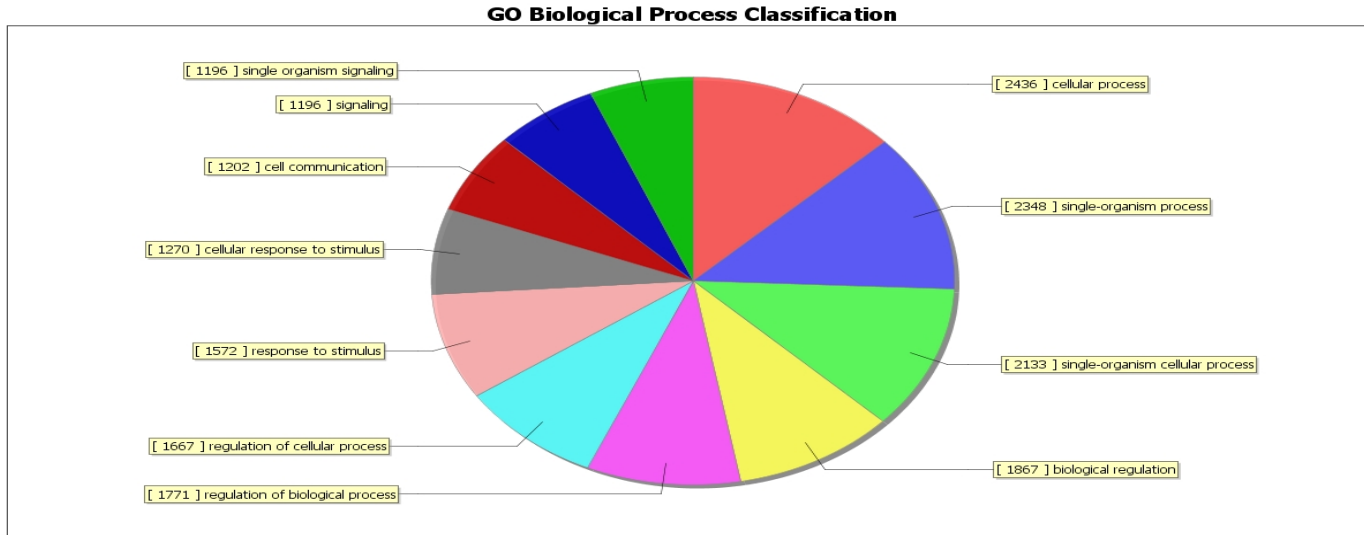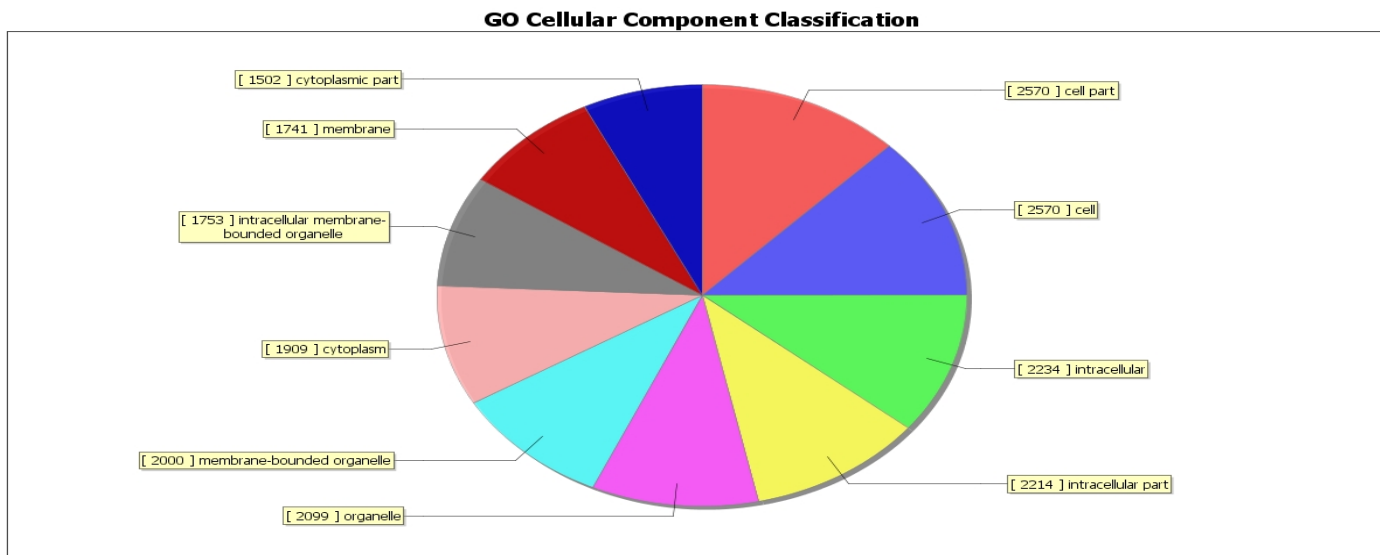

### GO Molecular Function Classification

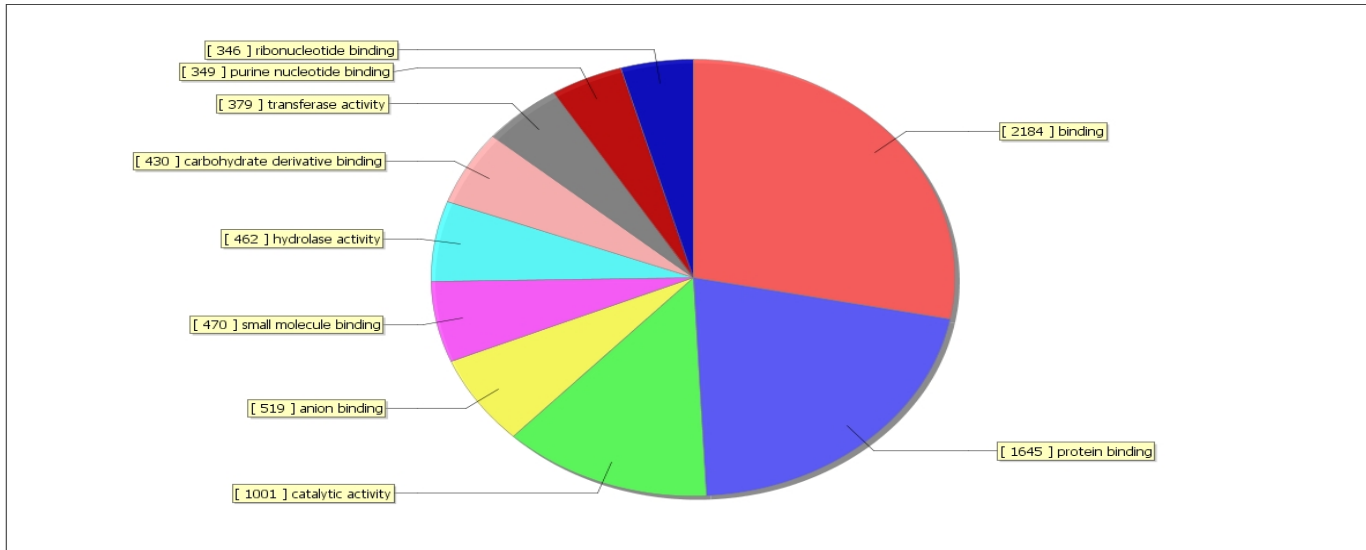

D) Most highly enriched GO terms for the Down-regulated mRNAs: Uninfected control vs Latent\_Infection

### GO Biological Process Classification

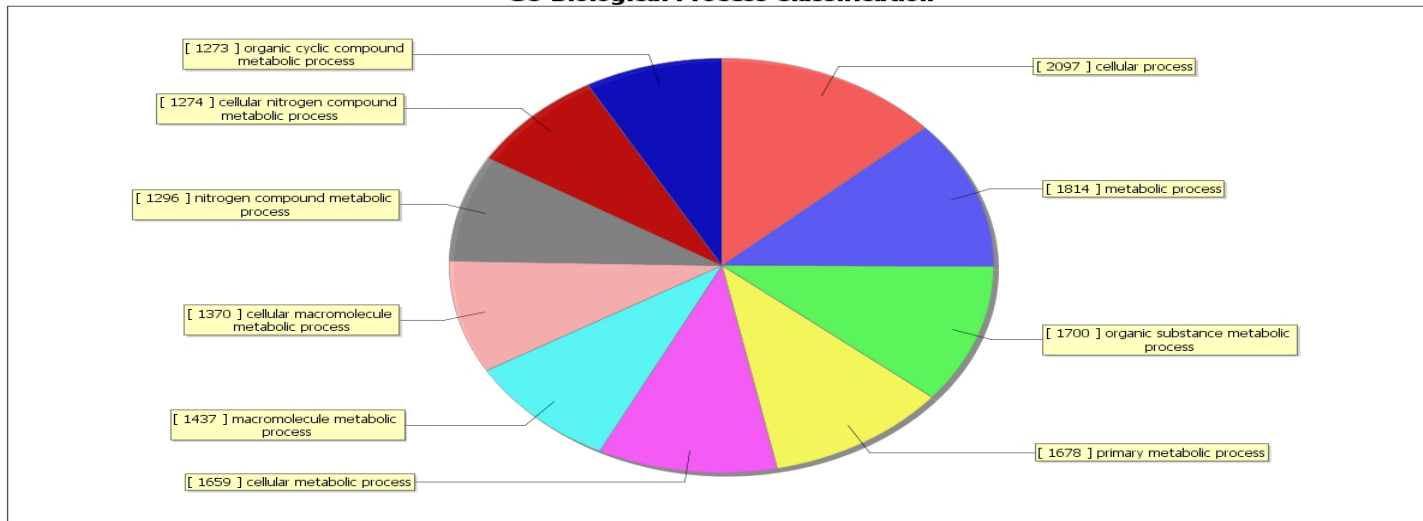

### GO Cellular Component Classification

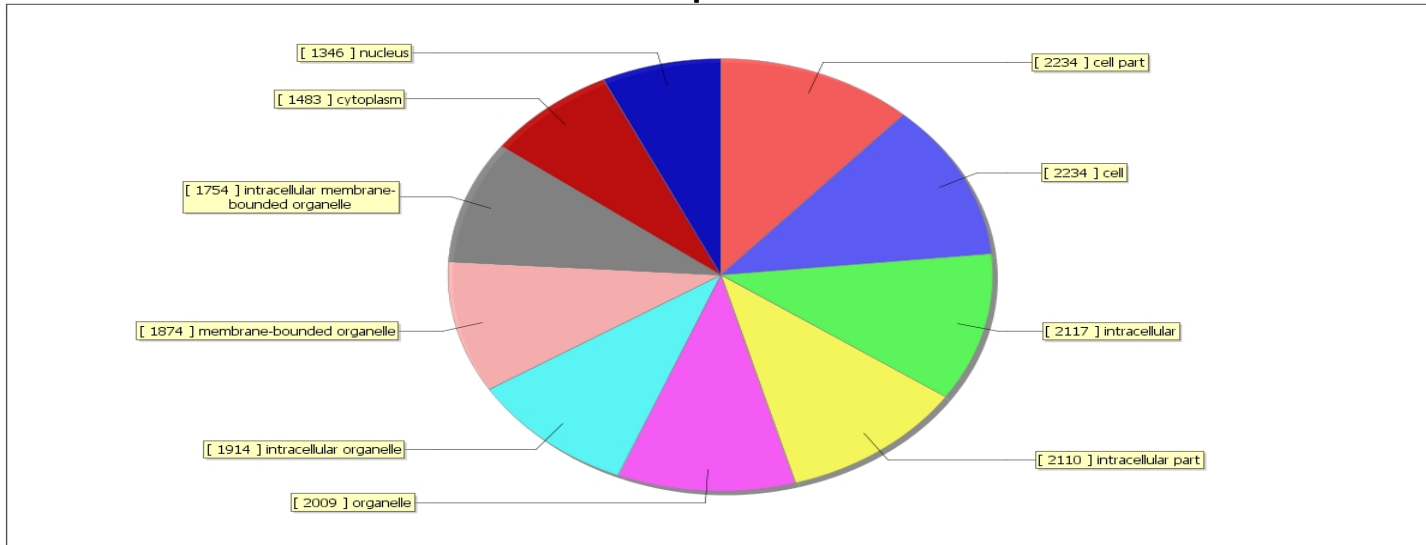

### GO Molecular Function Classification

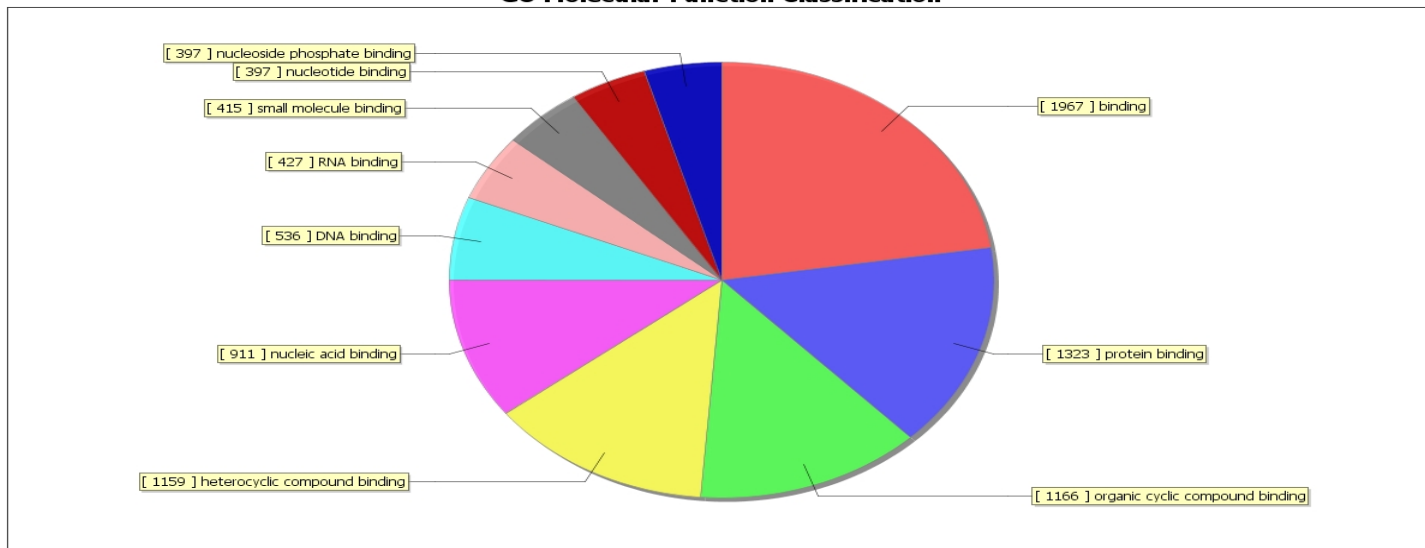

# Supplementary Information: Figure 7.

A1

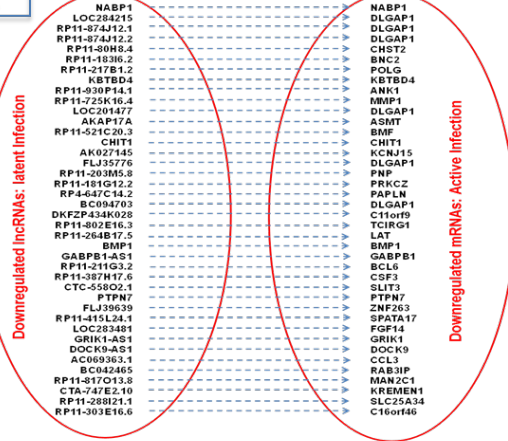

A2

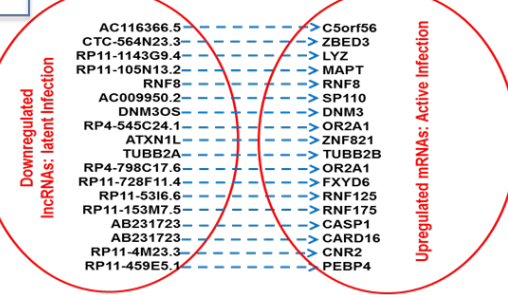

A3-1

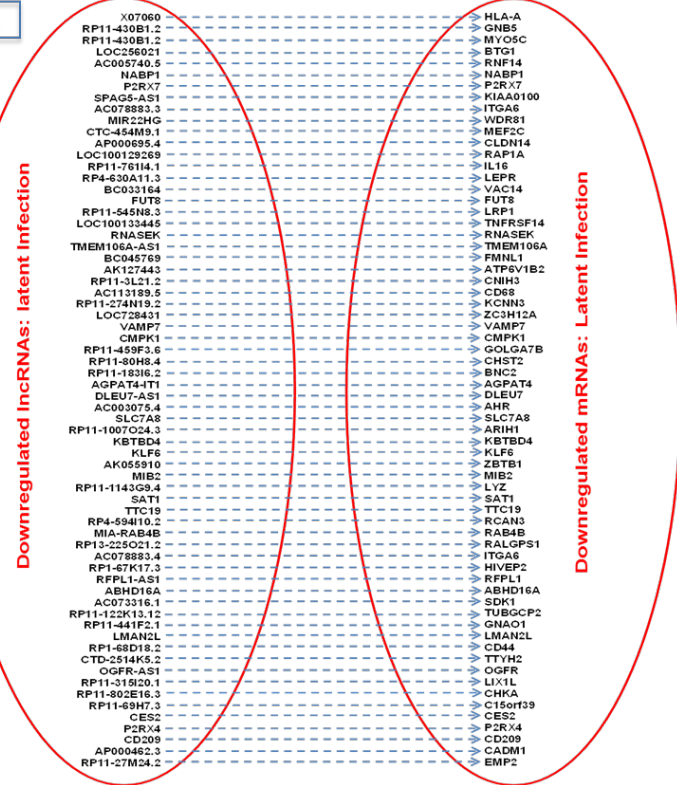

Figure 7 (contd.).

A3-2

Downregulated lncRNAs: latent Infection

|                 |          |
|-----------------|----------|
| AC018642.1      | MKLN1    |
| AC002480.5      | STEAP1B  |
| WDR13           | WDR13    |
| CTD-3118D11.2   | ATP6V0D2 |
| VAV3-AS1        | VAV3     |
| RP11-316M1.12   | CERS2    |
| TOM1            | TOM1     |
| RP11-532F12.5   | SPINT1   |
| SLC7A11-AS1     | SLC7A11  |
| RP11-105N13.2   | MAPT     |
| TMEM138         | TMEM138  |
| TMEM138         | CYBASC3  |
| RP11-286H14.6   | TSPAN33  |
| RP11-241G9.3    | OCLN     |
| TP73-AS1        | TP73     |
| RP11-104H15.9   | TMEM102  |
| ASIC1           | ASIC1    |
| RP11-400L8.2    | ADAM17   |
| RP11-725K16.4   | MMP1     |
| RP11-154B12.3   | IQGAP1   |
| RP11-720L2.2    | COLEC12  |
| CTD-2337A12.1   | ELL2     |
| RP4-612B15.3    | SH3GLB1  |
| AP000462.1      | CADM1    |
| SLC15A3         | SLC15A3  |
| SLC15A3         | TMEM132A |
| TM4SF19-AS1     | TM4SF19  |
| RP11-626G11.3   | ITPR1PL2 |
| RP11-100E13.1   | CNH3     |
| TRPM2           | TRPM2    |
| RP11-109P14.9   | MANEAL   |
| TPD52L2         | TPD52L2  |
| RP11-592O2.1    | SCARB1   |
| ARSD-AS1        | ARSD     |
| AKAP17A         | ASMT     |
| SDF2            | SDF2     |
| RP5-1148A21.3   | PTP4A1   |
| RP11-274J7.2    | SRGAP1   |
| RP11-862L9.3    | MBP      |
| PLEKHB2         | PLEKHB2  |
| AC093818.1      | ITGA6    |
| ADAM9           | ADAM9    |
| RP4-620F22.2    | GBP5     |
| RP5-1073O3.7    | HIPK1    |
| RP11-521C20.3   | BMF      |
| C20orf24        | C20orf24 |
| THTPA           | THTPA    |
| THTPA           | AP1G2    |
| AX747758        | APOL2    |
| LOC100505839    | SH3PX2A  |
| CTC-563A5.2     | RNF130   |
| RP11-961A15.1   | WDR81    |
| XLOC_008152     | SLC9A7   |
| SMAD6           | SMAD6    |
| TMEM44-AS1      | TMEM44   |
| CHIT1           | CHIT1    |
| RNASEK-C17ORF49 | RNASEK   |
| FW340055        | MXD1     |
| RP1-140A9.1     | GNB1     |
| CALHM2          | CALHM2   |
| BC070247        | SVIL     |
| AK128734        | JAK1     |
| AK027145        | KCNJ15   |
| BC052241        | MFSD12   |
| STXBP5-AS1      | STXBP5   |

Downregulated mRNAs: Latent Infection



Figure 7 (contd.).

A3-3

Downregulated lncRNAs: latent infection

RP11-580I16.2  
PIGT  
RP11-1334A24.6  
ADPGK-AS1  
BC068095  
TM4SF19-TCTEX1D2  
RP11-203M5.8  
AK310094  
RP11-181G12.2  
LOC100505815  
NGRN  
RP4-647C14.2  
CTD-2270L9.4  
AC133785.1  
POLR2M  
POLR2M  
RP5-842K24.2  
RP11-473I1.10  
DKFZP434K028  
MAN1B1  
ADPGK  
BC034684  
RP11-802E16.3  
AP000695.6  
RP11-37B2.1  
AF001548.5  
RP4-545C24.1  
CTB-31N19.3  
FCGR2C  
CCNDBP1  
CP  
CP  
PLEKHM1  
RP11-96D1.7  
RP13-314C10.5  
YIPF1  
RP11-264B17.5  
FLJ44511  
CTD-2243E23.1  
CHMP1A  
BMP1  
RP11-390P2.4  
GABPB1-AS1  
AP001062.7  
RP11-211G3.2  
CTD-2288O8.1  
AC046143.3  
RP11-121A14.3  
RP11-93B14.4  
KCNC4  
RP3-467K16.4  
RP11-445F6.2  
RP11-387H17.6  
RP11-713B9.1  
AK130481  
AB586698  
RP11-519C12.1  
RP4-798C17.6  
RP11-359P5.1  
AC092620.2  
CTC-558O2.1  
SLC4A8  
APLP2  
RP11-85K15.2  
CTD-3094K11.2

Downregulated mRNAs: Latent Infection

NPEPPS  
PIGT  
PDLIM7  
ADPGK  
C14orf182  
TM4SF19  
PNP  
SAT1  
PRKCZ  
TPD52L2  
NGRN  
PAPLN  
COG7  
ARHGEF4  
GCOM1  
POLR2M  
RAP2C  
C16orf72  
C11orf9  
MAN1B1  
ADPGK  
CHI3L1  
TCIRG1  
CLDN14  
RIPK2  
MYH11  
OR2A1  
METTL9  
FCGR2C  
CCNDBP1  
CP  
HPS3  
PLEKHM1  
PLA2G15  
SAT1  
YIPF1  
LAT  
PDGFA  
NRXN3  
CHMP1A  
BMP1  
NHSL1  
GABPB1  
C21orf2  
BCL6  
PELO  
TMEM44  
NEK6  
NTSR1  
KCNC4  
EFHD2  
TXLNB  
CSF3  
CADM1  
SLC33A1  
WDR26  
FAM214A  
OR2A1  
PPIC  
SPOPL  
SLIT3  
SLC4A8  
APLP2  
SRP54  
FURIN

Figure 7 (contd.).

A3-4

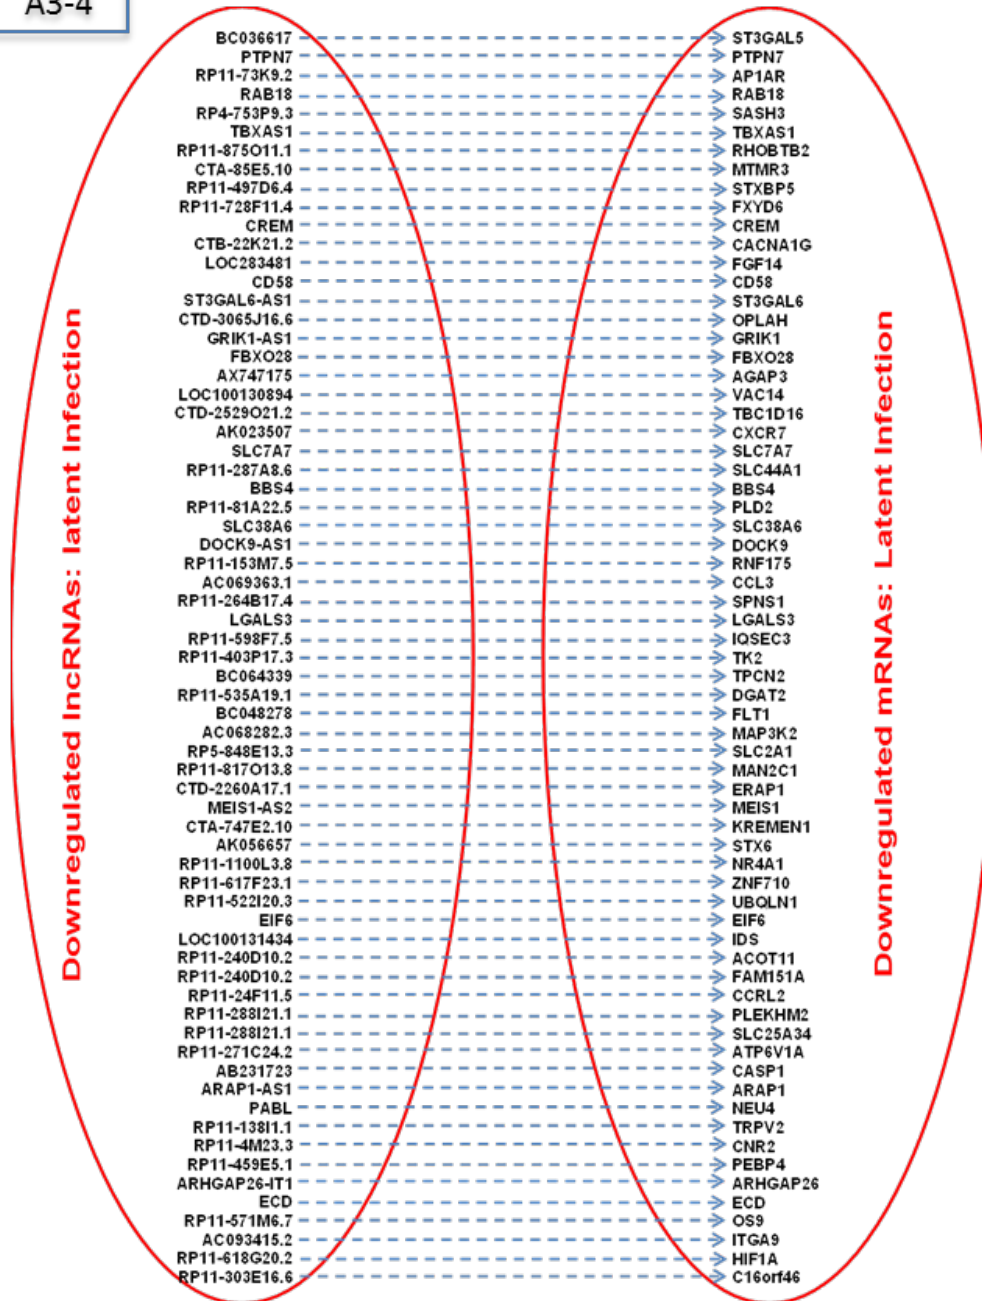

Figure 7 (contd.).

A4

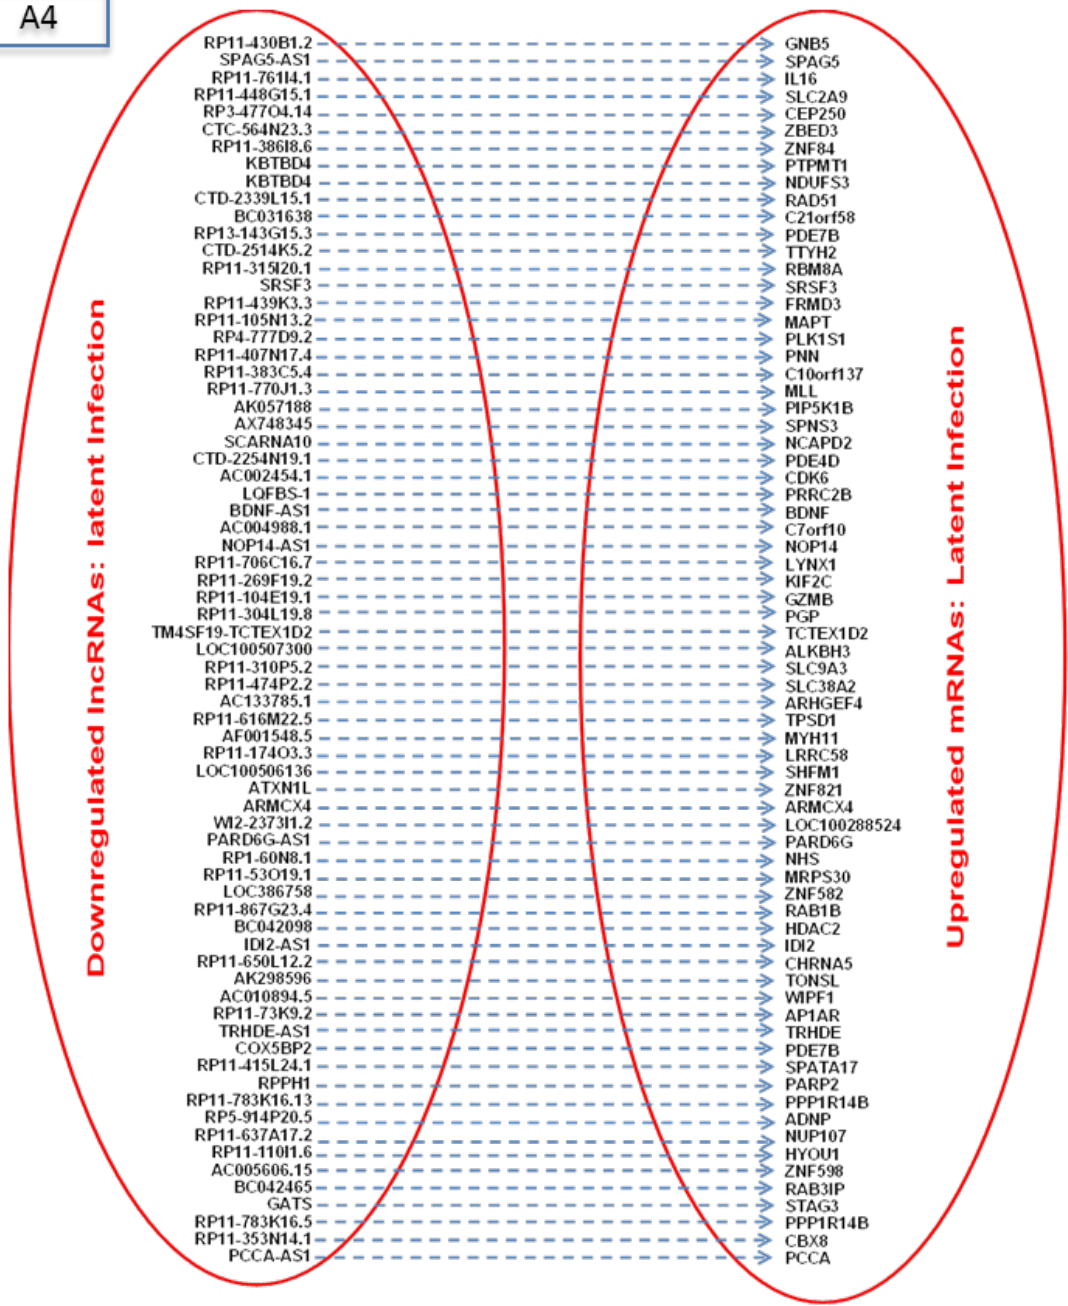

**Figure 8.**

A1

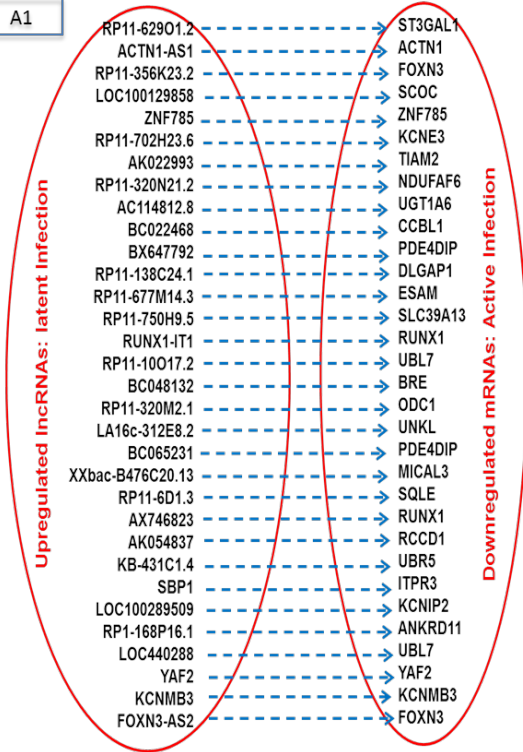

A2

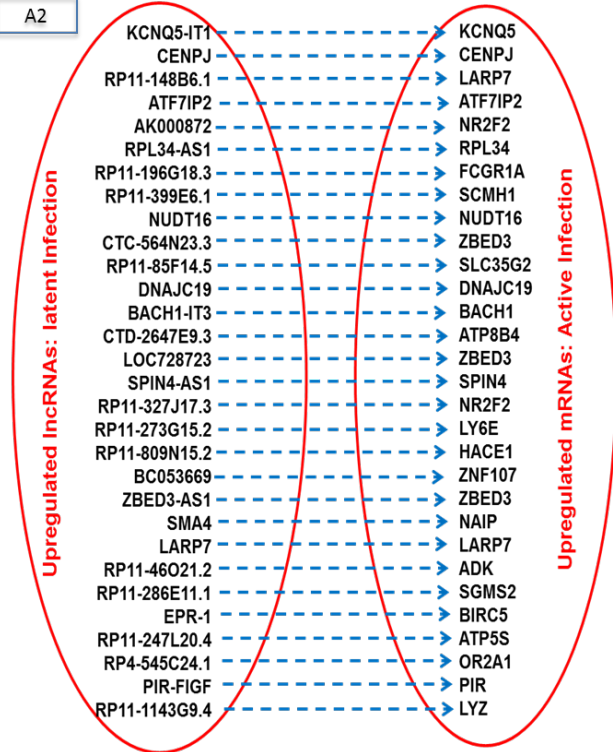

Figure 8 (contd.).

A3-1

Upregulated lncRNAs: latent infection

|               |          |
|---------------|----------|
| RP11-160H12.2 | DLG2     |
| RP11-629O1.2  | ST3GAL1  |
| RP11-85K15.2  | SRP54    |
| ACTN1-AS1     | ACTN1    |
| AC113189.5    | CD68     |
| TIPARP-AS1    | TIPARP   |
| MYLK-AS1      | MYLK     |
| BC033983      | TTC18    |
| AC020594.5    | RASGRP3  |
| AC093415.2    | ITGA9    |
| CTC-498J12.3  | SLC30A5  |
| SNHG1         | SLC3A2   |
| ZNFX1-AS1     | ZNFX1    |
| RP11-54C4.1   | ATOX1    |
| LOC100129858  | SCOC     |
| TMEM44-AS1    | TMEM44   |
| RP11-650L12.1 | IREB2    |
| CTA-445C9.14  | TFIP11   |
| LOC100506963  | TCEB3    |
| GLYCTK-AS1    | GLYCTK   |
| RP11-702H23.6 | KCNE3    |
| AK022993      | TIAM2    |
| RP11-454C18.2 | SUCNR1   |
| CTD-2353F22.1 | SLC1A3   |
| RP11-466F5.5  | ALDH9A1  |
| PGAP2         | PGAP2    |
| BACH1-IT3     | BACH1    |
| TMPO-AS1      | TMPO     |
| RP11-152N13.5 | TTC18    |
| ARHGAP31-AS1  | ARHGAP31 |
| RP11-195E11.3 | MAMDC2   |
| RP5-1092A11.2 | TP73     |
| LMLN-AS1      | LMLN     |
| RP11-30B1.1   | SDK1     |
| CTC-367J11.1  | NDST1    |
| RP11-18H7.1   | GSK3B    |
| BC022468      | CCBL1    |
| BX647792      | PDE4DIP  |
| RP11-368I7.2  | C16orf7  |
| TRAF3IP2-AS1  | TRAF3IP2 |
| IDH1-AS1      | IDH1     |
| BC061632      | TMEM44   |
| CTD-2363C16.1 | EBF1     |
| AK024134      | PPM1H    |
| AK055981      | ZNF710   |
| RP11-750H9.5  | SLC39A13 |
| PSMC3IP       | MLX      |
| RP11-332E19.2 | NRXN3    |
| RP11-243J16.7 | BCL2L1   |
| LOC100289092  | ATP2A1   |
| SPRED3        | SPRED3   |
| RP1-39G22.7   | ZMPSTE24 |
| RP11-618G20.4 | HIF1A    |
| TEN1-CDK3     | TEN1     |
| TEN1-CDK3     | ACOX1    |
| LOC100288122  | C18orf1  |
| CTD-3195I5.3  | ITGAE    |
| CDKN2B-AS1    | CDKN2B   |
| AK128593      | SEC31A   |
| C17orf69      | CRHR1    |
| AC034193.5    | EMC3     |
| LOC100506804  | TMEM30A  |
| AC079742.4    | ZDHHC4   |
| CAHM          | QKI      |
| RP11-113K21.5 | RAB30    |

Downregulated mRNAs: Latent infection

Figure 8 (contd.).

A3-2

Upregulated IncRNAs: latent Infection

AC068831.10  
 IPO9-AS1  
 RP11-10017.2  
 CTD-2015H6.3  
 BC048132  
 AC109333.10  
 MF12-AS1  
 AC004540.4  
 ADAM15  
 RP11-152N13.12  
 LA16c-312E8.2  
 LOC100289341  
 RP11-796E2.4  
 ARAP1-AS2  
 RP11-817O13.6  
 LOC285819  
 CTD-2196E14.6  
 LOC439949  
 KDM4A-AS1  
 ARHGAP5-AS1  
 RP5-956O18.2  
 BC065231  
 RP1-7G5.6  
 XXbac-B476C20.13  
 CTD-3074O7.5  
 CTD-3074O7.5  
 TATDN1  
 RP11-6D1.3  
 NTRK3-AS1  
 LOC644656  
 AK054837  
 SMA4  
 RP11-49G10.3  
 AF213884.2  
 RP11-325K4.2  
 RP4-714D9.2  
 RP11-473I1.9  
 RP1-34B21.6  
 SBP1  
 RP11-10K16.1  
 RP11-227H4.5  
 HLA-F-AS1  
 C6orf3  
 RP11-124N2.1  
 LOC100289509  
 AC018816.4  
 LOC100128881  
 LOC100507463  
 CTA-407F11.8  
 MEIS2  
 RP11-181C3.2  
 LOC440288  
 AC012487.2  
 CRYM-AS1  
 RP4-545C24.1  
 KCNMB3  
 RP11-74E22.3  
 AC079305.10  
 LINC00271  
 RP11-325K4.3  
 LOC100132774  
 RP11-727A23.7  
 RP11-983P16.4  
 RP11-1143G9.4  
 AX748417

VPS33B  
 NAV1  
 UBL7  
 FAM151B  
 BRE  
 KIF1C  
 MF12  
 SNX10  
 ADAM15  
 FAM149B1  
 UNKL  
 MANTB1  
 BTG1  
 ARAP1  
 NEL1  
 BTN2A1  
 UBF01  
 PRKCO  
 KDM4A  
 ARHGAP5  
 GALNT2  
 PDE4DIP  
 GLTP  
 MICAL3  
 PELI3  
 DPP3  
 RNF139  
 SQLE  
 NTRK3  
 ZNF143  
 RCCO1  
 NAIP  
 BPIFA3  
 NFKB1  
 HERPUD1  
 HIAT1  
 C16orf72  
 NFYA  
 ITPR3  
 GALNT7  
 CLDND1  
 HLA-F  
 TRAF3IP2  
 SLC41A3  
 KCNIP2  
 BHLHE40  
 C16orf7  
 TAP1  
 ADRBK2  
 MEIS2  
 TMPO  
 UBL7  
 LIMS1  
 CRYM  
 OR2A1  
 KCNMB3  
 KIAA0664  
 NFE2L2  
 AHI1  
 HERPUD1  
 KDM4A  
 ANKRD42  
 TENC1  
 LYZ  
 CAMK1

Downregulated mRNAs: Latent Infection

Figure 8 (contd.).

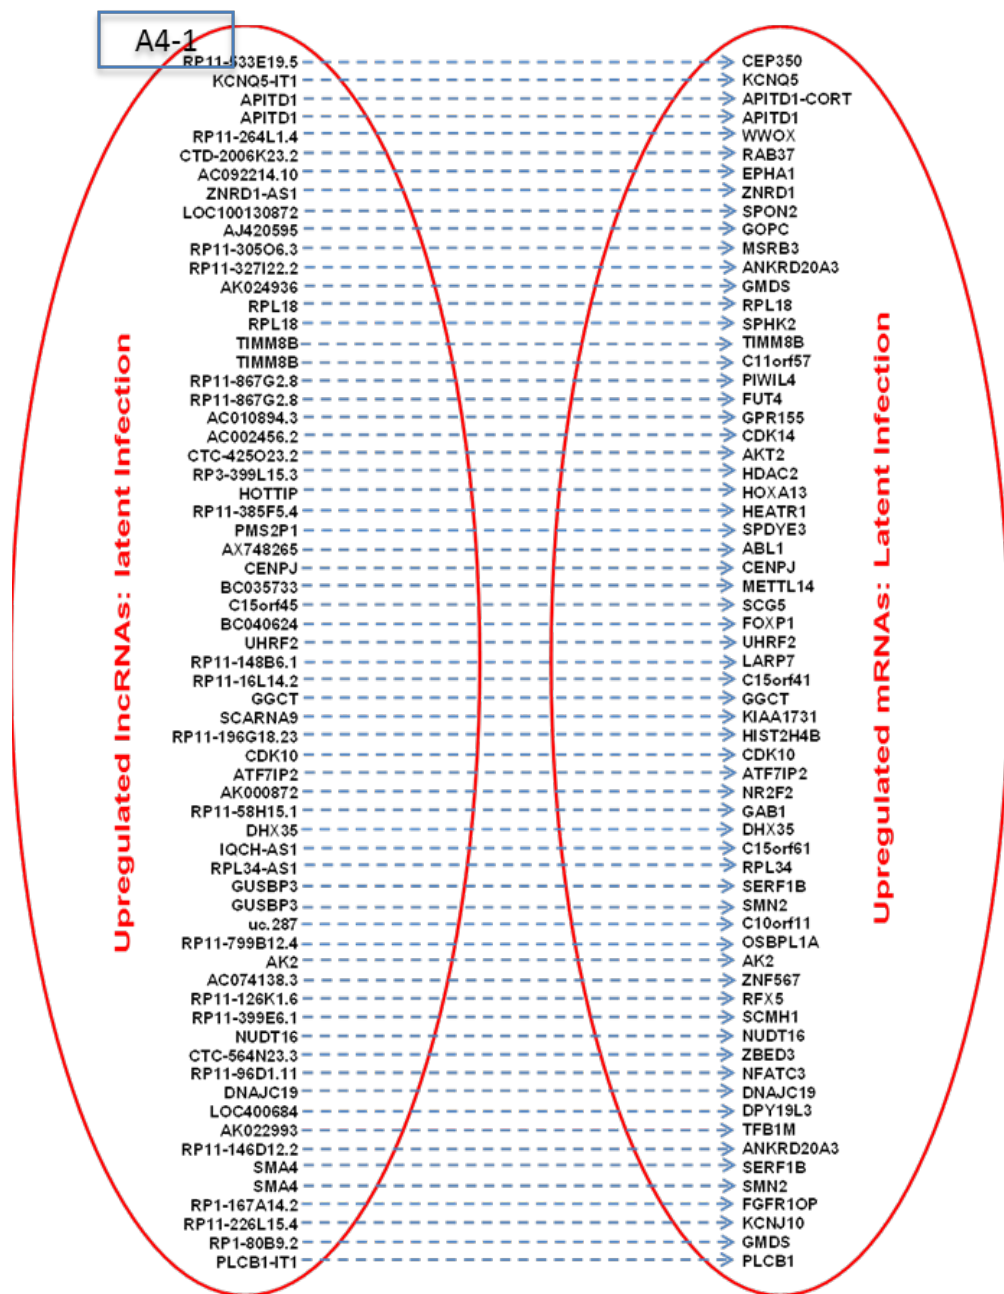

Figure 8 (contd.).

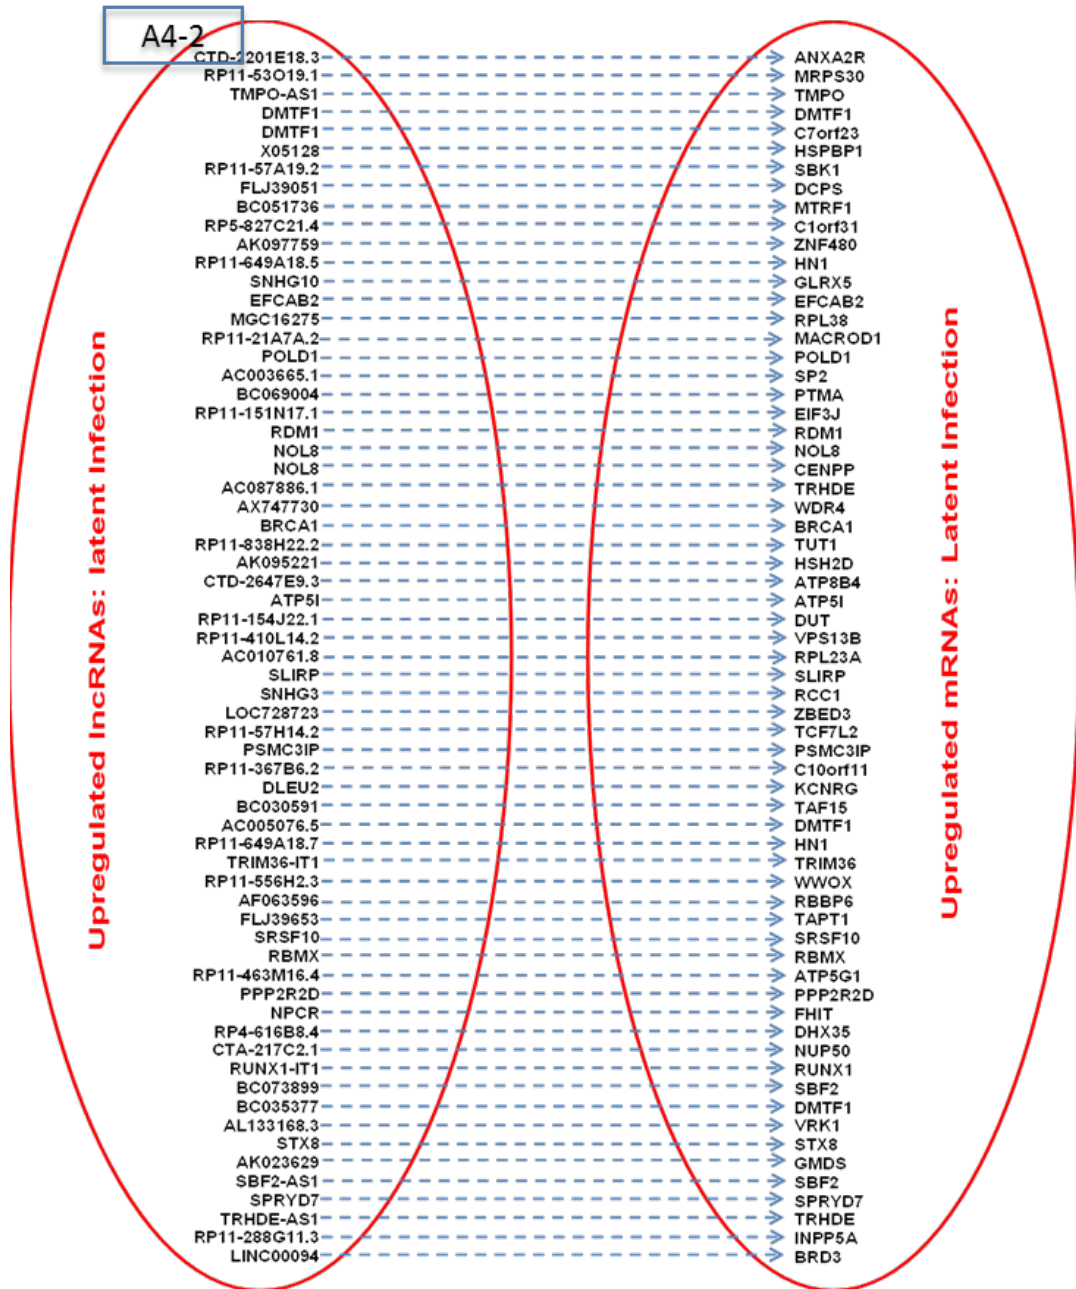



Figure 8 (contd.).

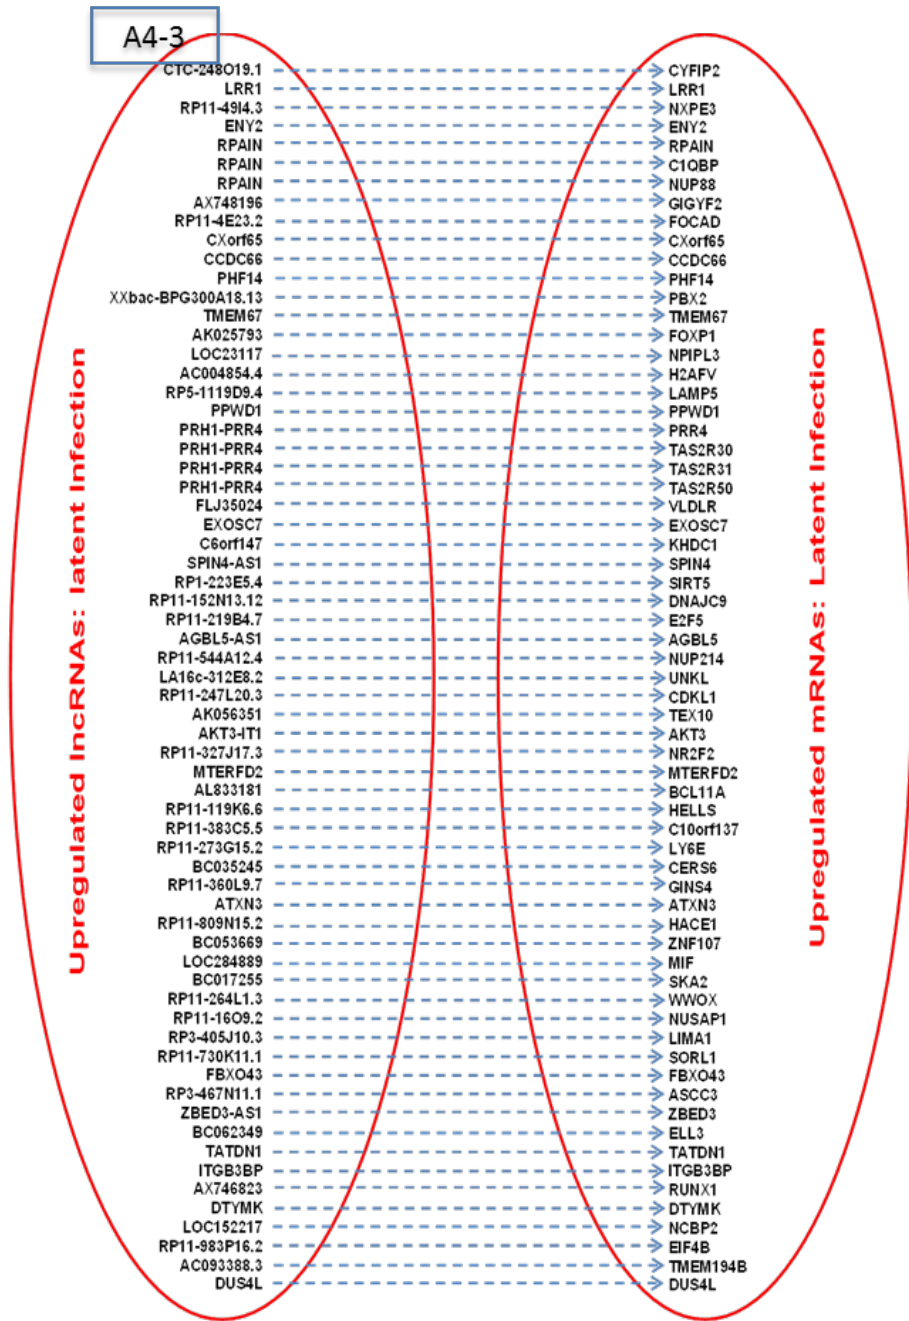

Figure 8 (contd.).

A4-4

Upregulated lncRNAs: latent Infection

|                |           |
|----------------|-----------|
| AX748233       | GEN1      |
| BCL7B          | BCL7B     |
| ABCA17P        | ABCA3     |
| RP11-603J24.17 | PA2G4     |
| RP11-125B21.2  | VLDLR     |
| NT5C           | NT5C      |
| HAUS1          | HAUS1     |
| BC032915       | DIAPH3    |
| DQ577420       | HSF2BP    |
| TYW3           | TYW3      |
| NDUFA2         | TMCO6     |
| RP11-538P18.2  | RSRC1     |
| RP11-383C5.4   | C10orf137 |
| TSEN15         | TSEN15    |
| AK126380       | MRPL23    |
| ZMAT1          | ZMAT1     |
| LOC100131626   | ATP5L     |
| XAGE1C         | XAGE1A    |
| RP4-714D9.2    | SASS6     |
| RP11-151N17.2  | EIF3J     |
| ABHD11         | ABHD11    |
| RP11-927P21.1  | LRRC37A3  |
| AX721280       | NT5C3     |
| LARP7          | LARP7     |
| LARP7          | C4orf21   |
| RP11-133J15.2  | NSUN6     |
| RP11-13N13.2   | SNRNP1    |
| MND1           | MND1      |
| U80764         | NSUN6     |
| EEF1E1-MUTED   | EEF1E1    |
| EEF1E1-MUTED   | BLOC1S5   |
| MMAB           | MMAB      |
| SBP1           | MNF1      |
| HMGB1P24       | ACACA     |
| WWC2-AS2       | WWC2      |
| EPR-1          | BIRC5     |
| AK056182       | MTRF1     |
| LOC401588      | ZNF674    |
| C7orf55        | C7orf55   |
| RP11-199F11.2  | TP53      |
| AC084117.3     | LDHA      |
| XLOC_010525    | IFT88     |
| RP11-556H2.2   | WWOX      |
| RP11-895M11.3  | CCDC88C   |
| SGOL1-AS1      | SGOL1     |
| HLA-F-AS1      | HLA-F     |
| RP11-96D1.5    | NFATC3    |
| AC005971.3     | CENPV     |
| POU5F1P4       | ASH1L     |
| RP11-338K17.8  | TCTN2     |
| INGX           | TAF1      |
| RP11-247L20.4  | ATP5S     |
| AF090939       | C3orf26   |
| LOC100507250   | NUP107    |
| RP11-173B14.5  | LMO7      |
| RP11-173B14.5  | UCHL3     |
| CREBZF         | CREBZF    |
| CTD-2349P21.11 | ATAD5     |
| RP11-649A18.4  | HN1       |
| INTS7          | INTS7     |
| INTS7          | DTL       |
| RP11-181C3.2   | TMPO      |
| XLOC_001023    | ENSA      |
| AF146191.4     | FRG1      |
| SHMT2          | NDUFA4L2  |

Upregulated mRNAs: Latent Infection

Figure 8 (contd.).

A4-5

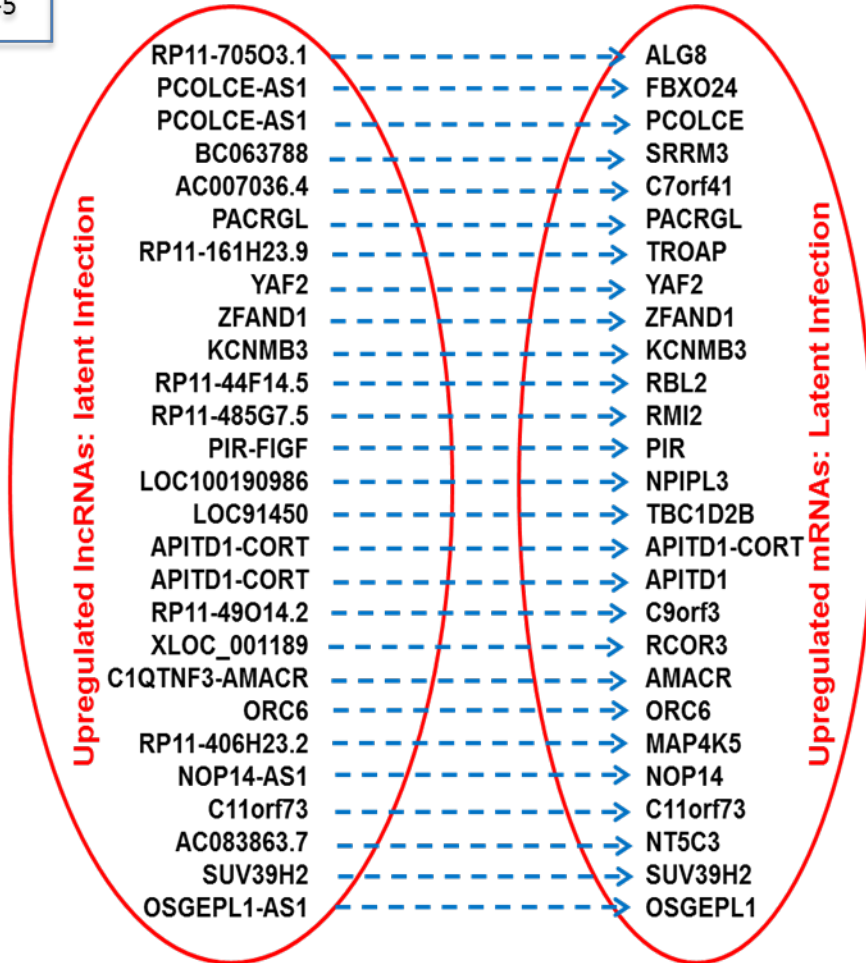

Supplement: srep34862-s1.pdf [file srep34862-s1.pdf]
